# Supplementary material
Source: MDPI journal article supplement (https://www.mdpi.com/1996-1073/14/5/1394)
Supplement: s1 [file s1]

## Supplementary Material

### A Long Short-term Memory Neural Network for the Low-cost Prediction of Soot Concentration in a Time-dependent Flame

Mehdi Jadidi, Luke Di Liddo, Seth B. Dworkin

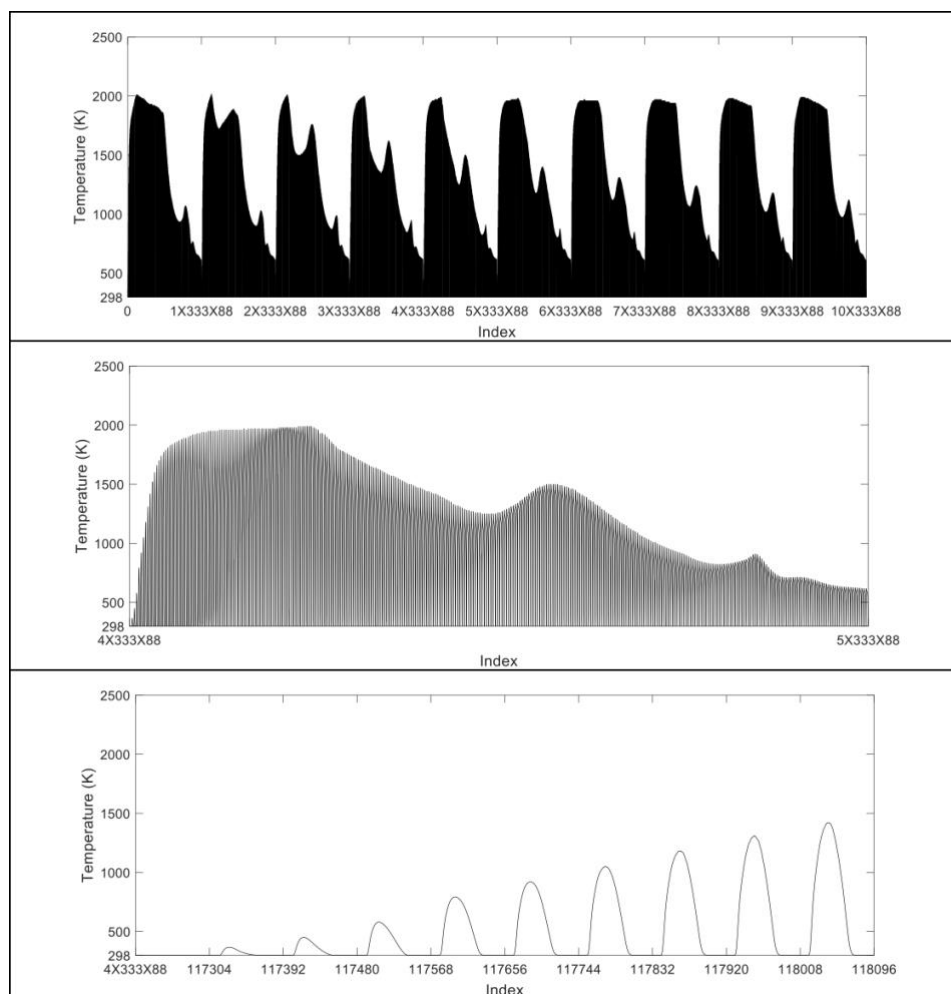

Figure S1: The contents of the spatiotemporal array for temperature. From top to bottom, the figure is zoomed in.

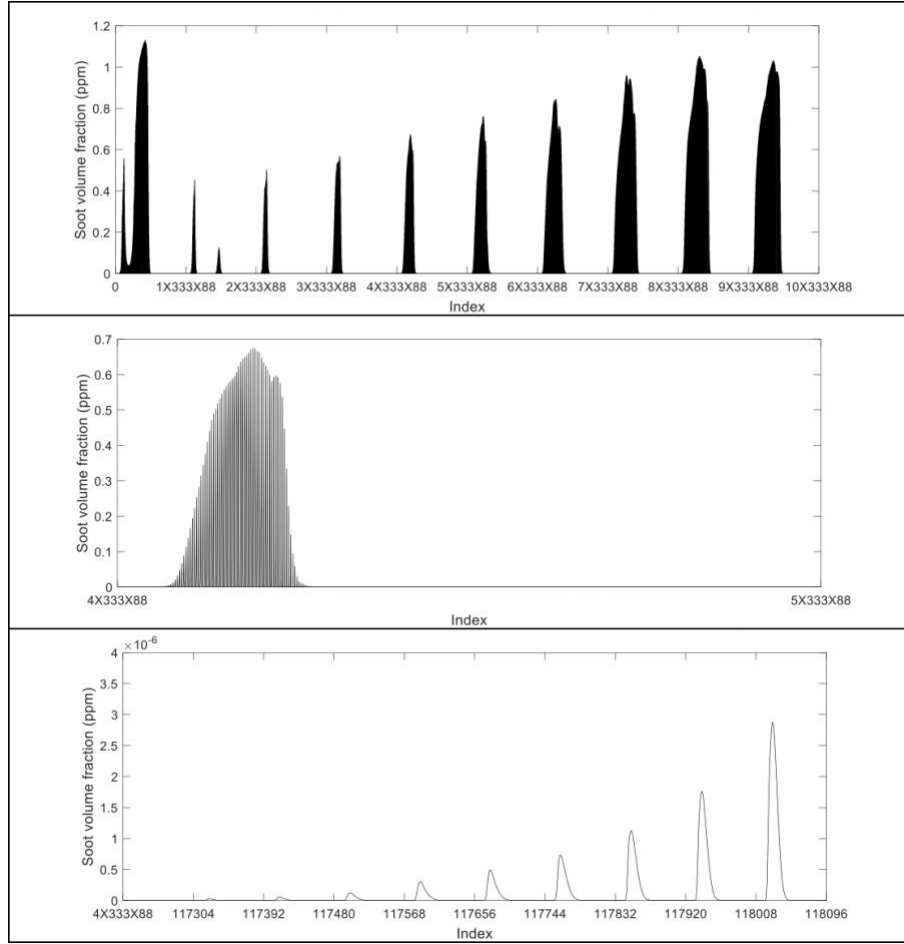

Figure S2: The contents of the spatiotemporal array for soot volume fraction. From top to bottom, the figure is zoomed in.

Table S1: The peak  $f_v$ , volume integral,  $RMSE$ , and relative errors for LSTM and CFD at each time step.

|                 | LSTM              |                 | CFD               |                 | RMSE   | Relative Error, $f_{v,max}$ | Relative Error, Vol. Int. |
|-----------------|-------------------|-----------------|-------------------|-----------------|--------|-----------------------------|---------------------------|
|                 | $f_{v,max}$ (ppm) | Volume integral | $f_{v,max}$ (ppm) | Volume integral |        |                             |                           |
| $t_1$           | 1.258             | 0.1848          | 1.126             | 0.1862          | 0.0515 | 11.72%                      | 0.75%                     |
| $t_2$           | 0.75              | 0.0129          | 0.453             | 0.0193          | 0.0116 | 65.56%                      | 33.16%                    |
| $t_3$           | 0.817             | 0.0225          | 0.504             | 0.0282          | 0.0188 | 62.10%                      | 20.21%                    |
| $t_4$           | 0.843             | 0.0421          | 0.57              | 0.0518          | 0.028  | 47.89%                      | 18.73%                    |
| $t_5$           | 0.86              | 0.0711          | 0.674             | 0.0881          | 0.0352 | 27.60%                      | 19.30%                    |
| $t_6$           | 0.914             | 0.1112          | 0.761             | 0.1383          | 0.0408 | 20.11%                      | 19.60%                    |
| $t_7$           | 0.984             | 0.168           | 0.845             | 0.204           | 0.049  | 16.45%                      | 17.65%                    |
| $t_8$           | 1.066             | 0.254           | 0.96              | 0.2891          | 0.0586 | 11.04%                      | 12.14%                    |
| $t_9$           | 1.143             | 0.3937          | 1.046             | 0.4004          | 0.0603 | 9.27%                       | 1.67%                     |
| $t_{10}$ (test) | 1.027             | 0.5083          | 1.3164            | 0.5254          | 0.055  | 21.98%                      | 3.25%                     |
